# Supplementary material
Source: PubMed Central journal article supplement (PMC6120665)
Supplement: EMBJ-37-e97572-s001.pdf [file EMBJ-37-e97572-s001.pdf]

## APPENDIX

### Table of Contents:

Appendix Supplementary Methods  
Appendix Supplementary Figure Legends  
References  
Appendix Figures S1-S8  
Appendix Table S1

### Appendix Supplementary Methods

#### *Ex vivo* lipolysis measurement

Isolated fat bodies from 20 larvae were homogenized on ice. TAG hydrolase activity was measured in the tissue extracts using a method based on <sup>3</sup>H-TO degradation, according to procedures described previously (Schweiger *et al.*, 2014).

#### Cell culture and siRNA-mediated knockdown

For RNAi knockdown of *PKM2* in HepG2 cells, HepG2 cells were cultured at 37°C in high glucose DMEM (HyClone) supplemented with 10% fetal bovine serum (HyClone), 100 U/ml penicillin and 100 µg/ml streptomycin (HyClone) in a 5% CO<sub>2</sub> incubator. A total of 100 pmole siRNA oligonucleotides and dsRED expression plasmid (1 µg) were transfected into HepG2 cells plated in 6-well dishes using Lipofectamine 2000 (Invitrogen). The sequences of siRNA oligonucleotides (Shanghai GenePharma Co., Ltd) are as follows: for human *PKM2* #1, sense 5'-GUGGUGAUCUAGGCAUUGATT -3' and antisense 5'-UCAAUGCCUAGAUCACCACTT -3'; for human *PKM2* #2, sense 5'-CAUGCUGUCUGGAGAAACATT -3' and antisense 5'-UGUUUCUCCAGACAGCAUGTT -3'. Control oligonucleotides with comparable GC content were also obtained from Shanghai GenePharma Co., Ltd. Twenty-four hours after RNAi treatment, oleic acid (OA) was added into the medium at a final concentration of 100 µM. Twenty-four hours after OA treatment, cells were stained with BODIPY and imaged with a confocal microscope.

For S2 cell assays, *Drosophila* S2 cells were maintained in Sf-900 II serum-free

medium (Gibco) at 25°C. The *pUAST*-expression plasmids were co-transfected with *actin-GAL4* plasmid by Cellfectin II (Invitrogen) and PLUS reagent (Invitrogen). Forty-eight hours after transfection, cells were fixed in 4% paraformaldehyde in PBS for 20 min, permeabilized in PBST (0.1% Triton X-100) for 5 min, blocked with 10% BSA in PBST for 1 hour and incubated with mouse monoclonal anti-ATP5A antibody (1:500; Abcam, ab14748) overnight at 4 °C. Alexa Fluor 555-conjugated goat anti-mouse (1:500; Invitrogen) were used as secondary antibodies. Following immunostaining, the cells were stained by DAPI for 5 min, washed three times in 1xPBS, mounted and immediately imaged with a confocal microscope.

### **Molecular biology**

For qPCR, reactions were performed with Trans Start Green qPCR superMix (TransGen, Co., Ltd, Beijing, China) on an Agilent Technologies MX3000P system.

Primers used were as follows (5'-3'):

*TBP-F* GGAGAGTTCTGGGATTGTAC  
*TBP-R* CTTATCCTCATGATTACCGCAG  
*PKM2-F* ATTATTTGAGGAACTCCGCCGCCT  
*PKM2-R* ATTCCGGGTCACAGCAATGATGG  
*PKM1-F* CGAGCCTCAAGTCACTCCAC  
*PKM1-R* GTGAGCAGACCTGCCAGACT  
*PKL-F* ATGGAAGGGCCAGCGGGGTATC  
*PKL-R* GGCCCGATGGTGGCAATGAT  
*PKR-F* CAGCTTCGGTCATGGGTCTCTAA  
*PKR-R* AGCTGCTGCTGCTGGAAGAA

For construction of *pUAST-CG18660-EGFP*, the coding region of *CG18660* without the stop codon was fused with *EGFP* and inserted into the *pUAST-attB* vector (NotI and KpnI).

### **Gene set enrichment analysis**

For RNA sequencing, total RNA was isolated from 3<sup>rd</sup> instar larval fat bodies using an RNeasy® Lipid Tissue Kit (QIAGEN). A total amount of 3 µg RNA per sample was used as input material for the RNA sample preparations. Sequencing libraries were

generated using the NEBNext® Ultra™ RNA Library Prep Kit for Illumina® (NEB, USA) following the manufacturer's recommendations and index codes were added to attribute sequences to each sample. Samples were sequenced on an Illumina HiSeq 2500 platform at Novogene Bioinformatics Technology Co., Ltd. The raw sequencing data of RNA-seq have been submitted to the Genome Sequence Archive (GSA) database with the accession number PRJCA000907.

Bam files were resampled and 75% of the total sequences were taken since the depth of the sequencing data was enough for quantitative analysis of the gene expression. The sequencing files were divided to create three repeats for the *dSeipin* and WT groups. As the GSEA software was designed for microarray data analysis, 74.1% the gene IDs were converted to microarray data IDs using the ID conversion tools from BioMart (version 0.9) (<http://www.biomart.org/>). The differentially expressed genes (DEGs) were quantified using DEseq with the selection criteria:  $p\text{-value} < 0.05$  and  $\log_2(\text{Fold Change}) > 1$ . The gene set files were downloaded from the GSEA website (<http://software.broadinstitute.org/gsea/index.jsp>). The enrichment scores (ES) were calculated for each gene set in the *dSeipin* and WT groups and only the gene sets which contained 5~1,000 genes was used for calculation.

### **Stable isotope carbon metabolic tracing**

Composition of medium (modified Schneider's Insect Solution):

| Ingredients                     | mg/L |
|---------------------------------|------|
| Disodium hydrogen phosphate     | 700  |
| Magnesium sulphate heptahydrate | 3700 |
| Potassium chloride              | 1600 |
| Potassium dihydrogen phosphate  | 450  |
| Sodium chloride                 | 2100 |
| Glycine                         | 250  |
| L-Arginine hydrochloride        | 483  |
| L-Aspartic acid                 | 400  |
| L-Cysteine hydrochloride        | 78   |
| L-Cystine dihydrochloride       | 100  |

|                                                                                |      |
|--------------------------------------------------------------------------------|------|
| L-Glutamic acid                                                                | 800  |
| L-Glutamine                                                                    | 1800 |
| L-Histidine hydrochloride monohydrate                                          | 540  |
| L-Isoleucine                                                                   | 150  |
| L-Leucine                                                                      | 150  |
| L-Lysine hydrochloride                                                         | 1650 |
| L-Methionine                                                                   | 800  |
| L-Phenylalanine                                                                | 150  |
| L-Proline                                                                      | 1700 |
| L-Serine                                                                       | 250  |
| L-Threonine                                                                    | 350  |
| L-Tryptophan                                                                   | 100  |
| L-Tyrosine disodium salt                                                       | 620  |
| L-Valine                                                                       | 300  |
| β-Alanine                                                                      | 500  |
| Alpha-Ketoglutaric acid                                                        | 200  |
| D (+) Glucose (unlabeled)/ U- <sup>13</sup> C <sub>6</sub> - Glucose (labeled) | 4000 |
| Fumaric acid                                                                   | 100  |
| L-Malic acid                                                                   | 100  |
| Succinic acid                                                                  | 100  |
| Yeast extract                                                                  | 2000 |

The pH was adjusted to  $6.7 \pm 0.2$  and the solution was sterilized immediately by filtration using a membrane with porosity of 0.22 microns.

#### **Glucose and DCA dietary treatment**

Extra glucose was added to ordinary fly medium at the indicated mass-volume concentration. DCA (Adamas Reagent Co., Ltd. Cat#37358A) was added to ordinary fly medium at the specified molar concentration. Adult flies were transferred from normal medium to the vial containing glucose food or DCA-supplemented food. The 3<sup>rd</sup> instar larvae of the next generation were analyzed.

## Appendix Supplemental Figure Legends

### Appendix Figure S1. Lipolysis activities of *dSeipin* mutants are not significantly different from the wild-type control

<sup>3</sup>H-labeled fatty acid released from <sup>3</sup>H-labeled TO was measured to determine the rate of lipolysis ( $n=3$ , 20 independent fat bodies for each repeat). Error bars represent  $\pm$ SEM and statistical analyses were performed with Mann-Whitney test. ns:  $p>0.05$ .

### Appendix Figure S2. Depletion of human PKM2 reduces fat storage in HepG2 cells

(A) Expression levels of various pyruvate kinases in HepG2 cells, as determined by qRT-PCR ( $n=3$ ). The *TBP* gene, which encodes TATA-binding protein, was used as the internal control. Error bars represent  $\pm$ SEM.

(B) HepG2 cells transfected with *PKM2* siRNAs. dsRED is a cotransfection maker. BODIPY staining labels lipid droplets. DAPI staining labels cell nuclei. White arrows indicate the positively transfected cells. Scale bar represents 20  $\mu$ m.

### Appendix Figure S3. Various genetic manipulations rescue the lipodystrophy caused by *SERCA* RNAi

Overexpressing *PyK* or *ERR*, or knockdown of *CG18660*, rescues the lipid storage defects in *SERCA* RNAi animals, while *MCU* overexpression fails to do so. Lipid droplets are stained by Nile red and nuclei are stained by DAPI.

*UAS-eGFP-Moesin-actin binding domain (GMA)* is used as the *UAS* control. Scale bar represents 50  $\mu$ m.

### Appendix Figure S4. Glycolytic gene transcripts are not reduced in *dSeipin* mutant fat bodies

(A) Relative mRNA levels of genes involved in glycolysis and the TCA cycle in *dSeipin* mutant fat bodies compared to wild type (WT). Data are from RNA-seq.

(B-D) Gene set enrichment analyses of RNA-seq data. The glycolysis-gluconeogenesis gene set (B) and the pyruvate metabolism gene set (C) are

not enriched, while the calcium signaling gene set (D) scores highly in this analysis. NES denotes normalized enrichment score. FDR denotes false discovery rate.

**Appendix Figure S5. External glucose cannot rescue the lipodystrophy of *dSeipin* mutants**

BODIPY staining labels lipid droplets and DAPI labels the nuclei of 3<sup>rd</sup> instar larval fat body. 3% or 10% glucose supplement does not rescue the fat body lipid storage phenotype of *dSeipin* mutants. Scale bar represents 50  $\mu\text{m}$ .

**Appendix Figure S6. ERMES is important for lipid storage**

(A) Rhod-2 staining indicates the mitochondrial calcium levels in fat bodies from 3<sup>rd</sup> instar larvae with RNAi knockdown of different ERMES factors and MCU.

(B) Mean red fluorescence intensity per unit area measured by ImageJ software.

Related to (A).  $n=6$ , error bars represent  $\pm\text{SEM}$  and statistical analyses were performed with one-way ANOVA with a post-Dunnett's multiple comparison test. Each RNAi column is compared to the control column. \*\*\* $P<0.001$ .

(C) BODIPY staining labels lipid droplets and DAPI labels the nuclei. Fat tissue-specific knockdowns of several ERMES factors and MCU result in decreased lipid storage.

Scale bar represents 50  $\mu\text{m}$  (A and C).

**Appendix Figure S7. Subcellular localization analysis of CG18660**

(A) EGFP-fused CG18660 partially colocalizes with a mitochondrial marker in S2 cells. Mitochondria are labeled by anti-ATP5A antibody. DAPI staining labels the nuclei. The box in each top right corner is the zoomed picture of the region enclosed by the white frame. Scale bar represents 5  $\mu\text{m}$ .

(B) Colocalization analysis calculated by Pearson's correlation coefficient (R).

Related to (A).  $n=3$ , error bars represent  $\pm\text{SEM}$ .

**Appendix Figure S8. DCA rescues the lipid storage defect of *dSeipin* mutant**

(A) BODIPY staining labels lipid droplets and DAPI labels the nuclei of 3<sup>rd</sup> instar larval fat bodies. Two different doses of DCA were used, and both can rescue the lipid storage phenotype of *dSeipin* mutants. Scale bar represents 50  $\mu$ m.

(B) Determination of TAG levels in 3<sup>rd</sup> instar larval fat bodies of wild type and *dSeipin* mutants reared on different foods, related to (A) ( $n=6$ ,  $\geq 10$  independent fat bodies for each repeat).

Error bars represent  $\pm$ SEM and statistical analyses were performed with one-way ANOVA with a post-Tamhane's T2 test. \*\*\* $P < 0.05$ .

### **Appendix Table S1. Metabolic profiling of wild type versus *dSeipin* mutant fat bodies**

Metabolomic profiling reveals changes in amino acids and TCA cycle and glycolysis metabolites in *dSeipin* mutant fat bodies compared to *w<sup>1118</sup>*. Control and *dSeipin* mutant 3<sup>rd</sup> instar larval fat tissue extracts were subjected in quintuplicate to analysis on GC/MS platforms to compare the relative levels of metabolites. The fold change and t-test p value are shown for each metabolite.

### **Reference**

Schweiger M, Eichmann TO, Taschler U, Zimmermann R, Zechner R, Lass A (2014) Measurement of lipolysis. *Methods Enzymol* 538: 171-193

## Appendix Figure S1

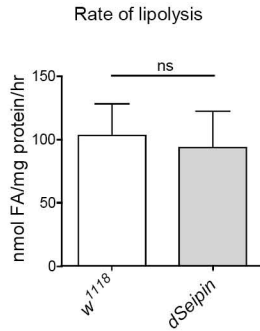



# Appendix Figure S2

## A

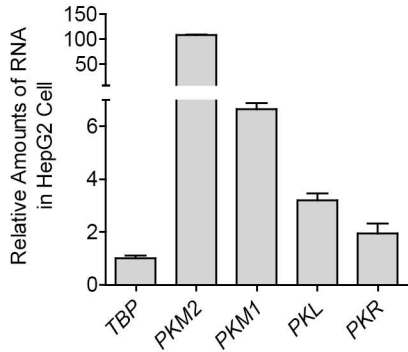

## B

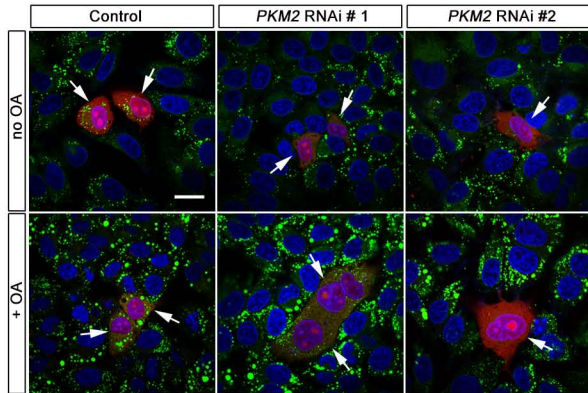

Appendix Figure S3

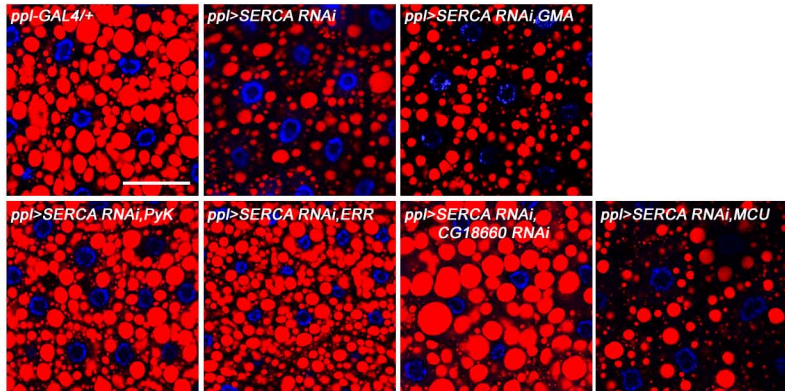



## Appendix Figure S5

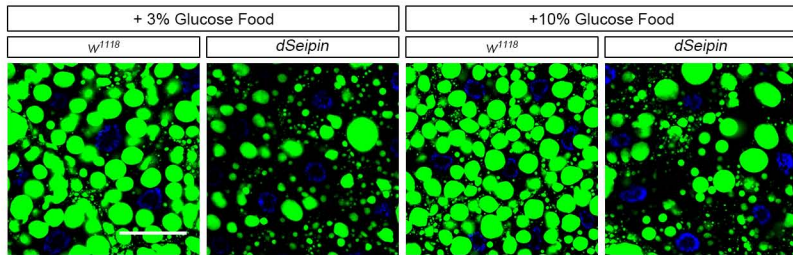

# Appendix Figure S6

**A**

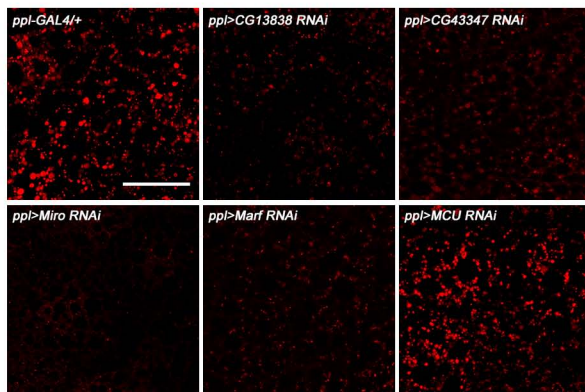

**B**

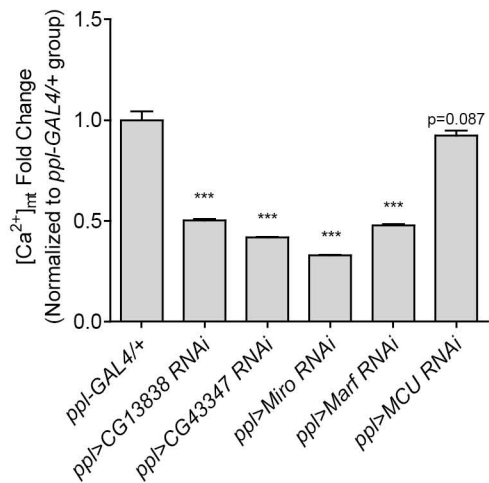

**C**

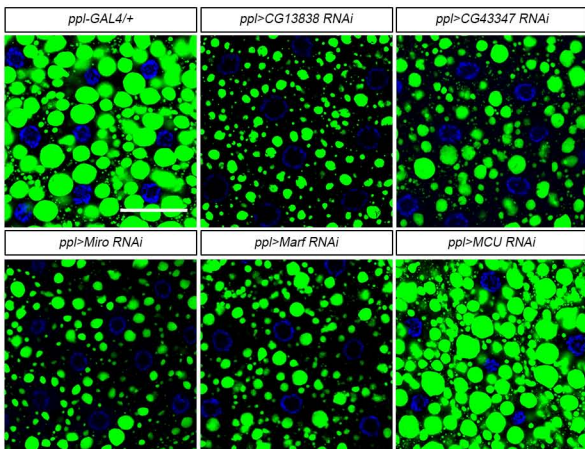

# Appendix Figure S7

**A**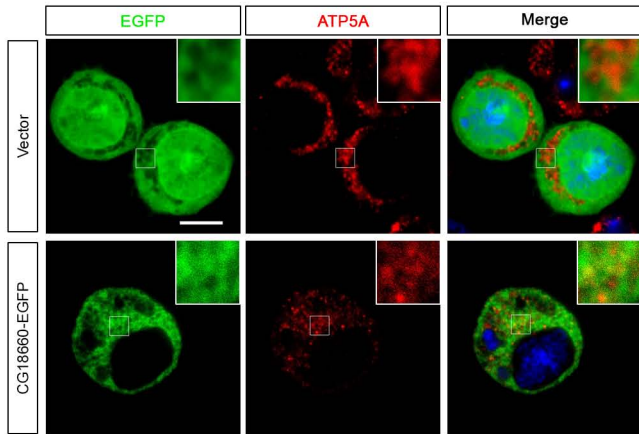**B**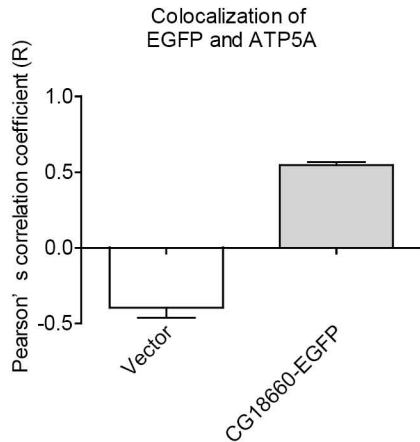

# Appendix Figure S8

## A

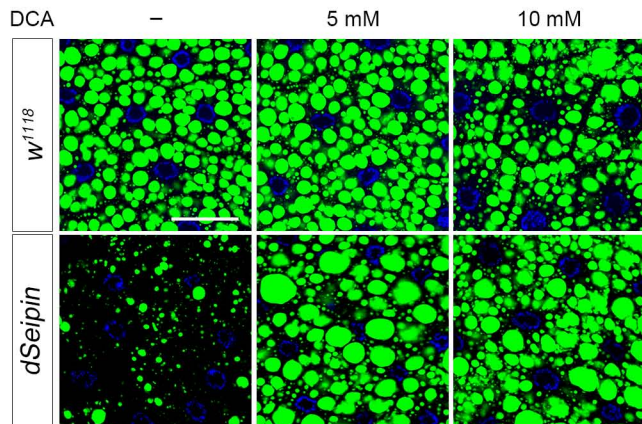

## B

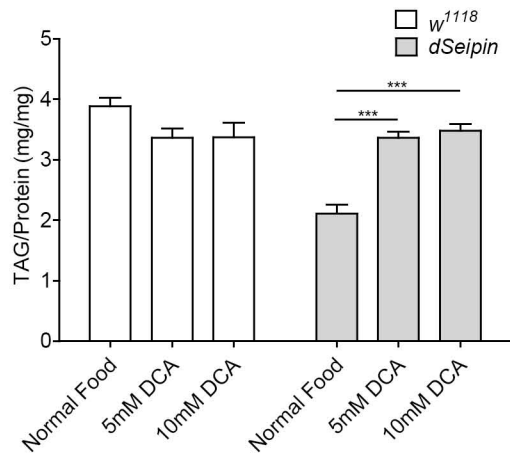

Appendix Table S1

|                   | Metabolite                     | Fold change ( <i>dSeipin</i> /WT) | p value |                               | Metabolite               | Fold change ( <i>dSeipin</i> /WT) | p value |
|-------------------|--------------------------------|-----------------------------------|---------|-------------------------------|--------------------------|-----------------------------------|---------|
| <b>AMINO ACID</b> |                                |                                   |         | <b>ORGANIC ACID and OTHER</b> |                          |                                   |         |
|                   | L-valine                       | 2.2057                            | 0.0063  |                               | D-ribose-5-phosphate     | 1.4556                            | 0.0370  |
|                   | L-alanine                      | 2.4390                            | 0.0030  |                               | glycolic acid            | 2.7505                            | 0.0320  |
|                   | L-leucine                      | 2.1749                            | 0.0090  |                               | oxalic acid              | 1.2202                            | 0.2778  |
|                   | L-proline                      | 3.0253                            | 0.0016  |                               | urea                     | 1.2484                            | 0.2770  |
|                   | L-serine                       | 2.0724                            | 0.0018  |                               | phosphoric acid          | 1.8566                            | 0.0006  |
|                   | DL-isoleucine                  | 2.2919                            | 0.0060  |                               | glycerol                 | 1.3939                            | 0.1468  |
|                   | glycine                        | 1.4796                            | 0.0519  |                               | Putrescine               | 1.7391                            | 0.0075  |
|                   | L-threonine                    | 3.0583                            | 0.0208  |                               | glycerol 1-phosphate     | 1.0999                            | 0.5445  |
|                   | Homocysteine                   | 3.4269                            | 0.1058  |                               | O-phosphocolamine        | 0.9982                            | 0.9905  |
|                   | Beta- alanine                  | 2.0397                            | 0.0126  |                               | 6-phosphogluconate       | 1.6243                            | 0.0485  |
|                   | aspartic acid                  | 3.0365                            | 0.0060  |                               | citrulline               | 2.1477                            | 0.0008  |
|                   | Pyroglutamic acid              | 1.8201                            | 0.0013  |                               | Pantothenic acid         | 2.2779                            | 0.0124  |
|                   | L-glutamic acid                | 0.9571                            | 0.8197  |                               | gluconic acid            | 1.6428                            | 0.0456  |
|                   | Phenylalanine1                 | 2.3643                            | 0.0010  |                               | cytidine-5-monospbate    | 2.4394                            | 0.0030  |
|                   | $\alpha$ -Hydroxyglutaric acid | 1.5336                            | 0.0489  |                               | palmitoleic acid         | 1.2468                            | 0.2498  |
|                   | Ornithine                      | 2.2778                            | 0.0051  |                               | L-DOPA                   | 4.8216                            | 0.0003  |
|                   | L-asparagine                   | 1.4097                            | 0.1703  |                               | uric acid                | 2.7281                            | 0.0052  |
|                   | L-glutamine                    | 2.1908                            | 0.0005  |                               | 6-phosphogluconate       | 1.6243                            | 0.0485  |
|                   | tyrosine                       | 0.9158                            | 0.9059  |                               | inosine                  | 2.1271                            | 0.0031  |
|                   | L-histidine                    | 7.8939                            | 0.0010  |                               | Adenosine-5-monophaphate | 3.2141                            | 0.0484  |
|                   | L-lysine                       | 4.1460                            | 0.0007  |                               | sorbose                  | 0.4316                            | 0.0212  |
|                   | L-tryptophan                   | 2.1837                            | 0.0116  |                               | D-(+) trehalose          | 1.5942                            | 0.0234  |
| <b>TCA CYCLE</b>  |                                |                                   |         |                               | myo-inositol             | 3.1305                            | 0.0002  |
|                   | citric acid+isocitric acid     | 0.0767                            | 0.0295  |                               | talose                   | 4.6295                            | 0.0016  |
|                   | fumaric acid                   | 0.1002                            | 0.0019  |                               | maltose                  | 2.1611                            | 0.0042  |
|                   | D-malic acid                   | 0.1386                            | 0.0136  |                               | isomaltose               | 2.6297                            | 0.0101  |
|                   | alpha ketoglutaric acid        | 1.6197                            | 0.2346  |                               | mannose                  | 4.3824                            | 0.0001  |
|                   | succinic acid                  | 1.7848                            | 0.0209  |                               |                          |                                   |         |
| <b>GLYCOLYSIS</b> |                                |                                   |         |                               |                          |                                   |         |
|                   | pyruvate                       | 3.1178                            | 0.0006  |                               |                          |                                   |         |
|                   | L-(+) lactic acid              | 2.5358                            | 0.0106  |                               |                          |                                   |         |
|                   | glucose-6-phosphate            | 1.9990                            | 0.0329  |                               |                          |                                   |         |
|                   | 3-phosphoglyceric acid         | 4.6250                            | 0.0020  |                               |                          |                                   |         |
